# Supplementary material for: PRAME Expression: A Target for Cancer Immunotherapy and a Prognostic Factor in Uveal Melanoma
Source: PubMed Central journal article supplement — Invest Ophthalmol Vis Sci. 2023 Dec 27;64(15):36. doi: 10.1167/iovs.64.15.36 (PMC10755595; doi:10.1167/iovs.64.15.36), 2023-12-27
Supplement: iovs-64-15-36_s001.pdf [file iovs-64-15-36_s001.pdf]

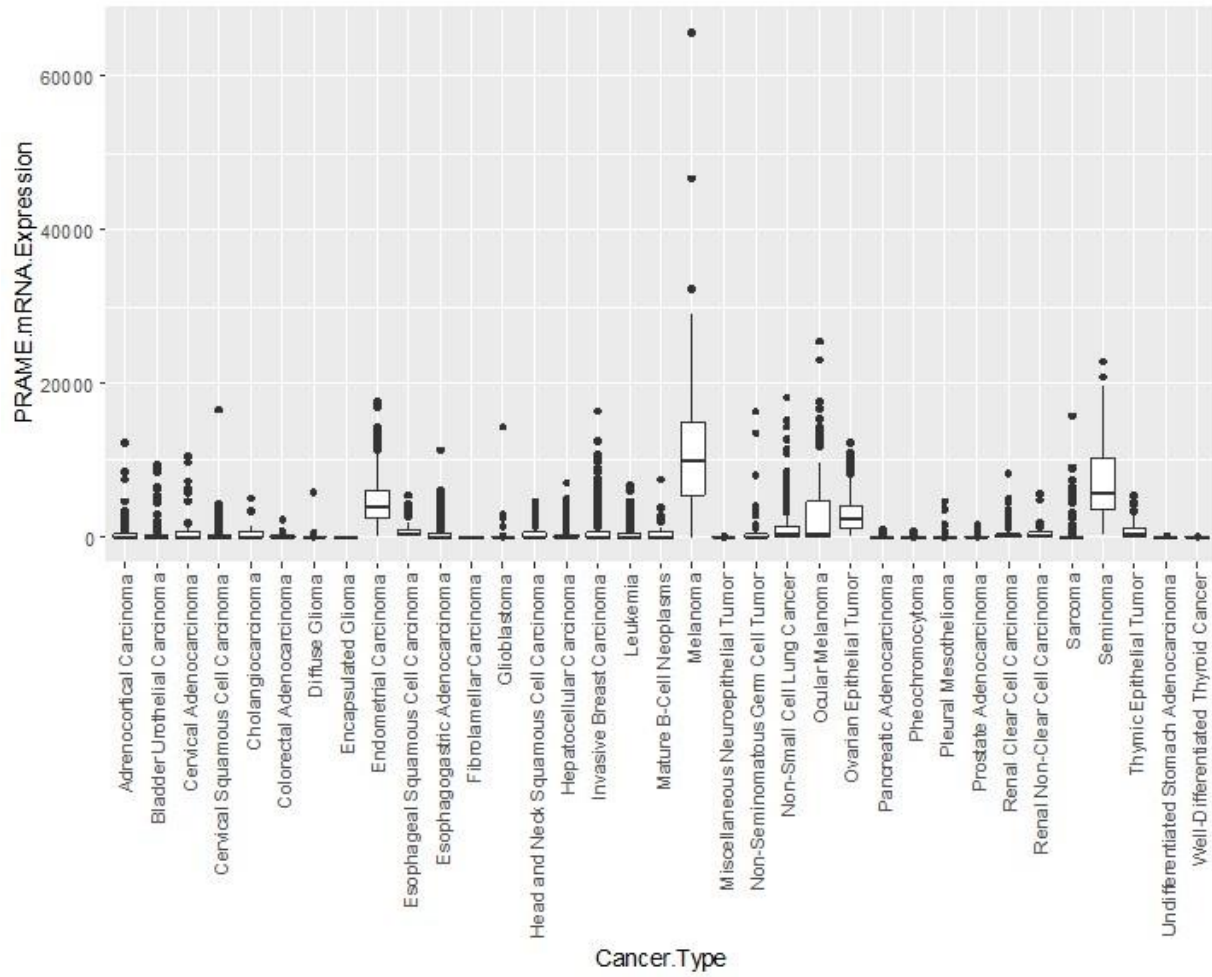

Supplementary Figure S1: Distribution of PRAME mRNA expression across several cancer types (TCGA database). Data extracted from MSK-IMPACT pan cancer study. The original data were downloaded from [www.cbioportal.org](http://www.cbioportal.org)
