# Supplementary material for: PRAME Expression: A Target for Cancer Immunotherapy and a Prognostic Factor in Uveal Melanoma
Source: PubMed Central journal article supplement — Invest Ophthalmol Vis Sci. 2023 Dec 27;64(15):36. doi: 10.1167/iovs.64.15.36 (PMC10755595; doi:10.1167/iovs.64.15.36), 2023-12-27
Supplement: iovs-64-15-36_s002.pdf [file iovs-64-15-36_s002.pdf]

Maria Chiara Gelmi

**PRAME Expression in Uveal Melanoma: prognostic factor and target for Immunotherapy.**

SUPPLEMENTARY TABLES:

Table S1: panel of 15 genes used for gene expression profiling (Onken, Worley et al. 2010)

Table S2. Proportion of solid cancers with PRAME expression and prognostic significance of PRAME expression.

Table S3. Proportion of haematological malignancies expressing PRAME and prognostic significance of PRAME expression.

Table S4 Distribution of clinical, histopathological, and genetic features in PRAME-positive and PRAME-negative UM (D3 UM patients from the LUMC cohort, total 24).

Table S5. Distribution of clinical, histopathological, and genetic features in PRAME-positive and PRAME-negative UM (M3 UM patients from the LUMC cohort, total 40).

Table S6. Distribution of clinical, histopathological, and genetic features in UM with low PRAME and high PRAME(D3 UM patients from the TCGA study, total 38).

Table S7. Distribution of clinical, histopathological, and genetic features in UM with low PRAME and high PRAME (M3 UM patients from the TCGA study, total 42).

Table S8: Distribution of BAP1, SF3B1 and EIF1AX mutation in UM with respect to PRAME expression in the TCGA cohort

Table S9: Distribution of EMT markers in PRAME positive and PRAME negative tumours in a cohort of 64 UM patients, Mann Whitney U test.

Table S10: Distribution of infiltrate markers in PRAME positive and PRAME negative tumours in a 24 D3 and 40 M3 UM patients, Mann Whitney U test.

Table S11: Top 20 differentially expressed genes in PRAME-positive UM vs PRAME-negative UM.

Table S11a. Most upregulated genes in 29 PRAME-positive UM vs 35 PRAME-negative UM. Table

S11b. Most downregulated genes in 29 PRAME-positive UM vs 35 PRAME-negative UM.

Table S1: panel of 15 genes used for gene expression profiling (Onken 2010)

|                          | Symbol | Gene name                                         |
|--------------------------|--------|---------------------------------------------------|
| Differentially expressed | CDH1   | E-cadherin                                        |
|                          | ECM1   | Extracellular matrix protein 1                    |
|                          | HTR2B  | 5-Hydroxytryptamine receptor 2B                   |
|                          | RAB31  | RAB31 (RAS oncogene family)                       |
|                          | EIF1B  | Eukaryotic translation initiation factor 1B       |
|                          | FXR1   | Fragile X mental retardation, autosomal homolog 1 |
|                          | ID2    | Inhibitor of DNA binding 2                        |
|                          | LMCD1  | LIM and cysteine-rich domains 1                   |
|                          | LTA4H  | Leukotriene A4 hydrolase                          |
|                          | MTUS1  | Microtubule-associated tumor suppressor 1         |
|                          | ROBO1  | Roundabout, axon guidance receptor, 1             |
|                          | SATB1  | SATB homeobox 1                                   |
| Control genes            | MRPS21 | Mitochondrial ribosomal protein S21               |
|                          | RBM23  | RNA-binding motif protein 23                      |
|                          | SAP130 | Sin3A-associated protein , 130 kDa                |

| Table S2. Proportion of solid cancers with PRAME expression and prognostic significance of PRAME expression. |                                   |            |                                            |                                                                               |                                                                                          |
|--------------------------------------------------------------------------------------------------------------|-----------------------------------|------------|--------------------------------------------|-------------------------------------------------------------------------------|------------------------------------------------------------------------------------------|
| Tumour                                                                                                       | Reference                         | Method     | Nr of samples                              | Expression                                                                    | Prognosis                                                                                |
| Cutaneous melanoma                                                                                           | (Ikeda, Lethé et al. 1997)        | RT-PCR     | 49                                         | 88%                                                                           |                                                                                          |
|                                                                                                              | (Lezcano, Jungbluth et al. 2018)  | IHC        | 155 primary<br>100 metastatic              | 83% in primary tumour (90% excluding desmoplastic)<br>92% in metastatic       |                                                                                          |
| NSCLC                                                                                                        | (Ikeda, Lethé et al. 1997)        | RT-PCR     | 26 adenocarcinomas<br>65 squamous          | 46% adenocarcinomas<br>78% squamous                                           |                                                                                          |
|                                                                                                              | (Bankovic, Stojsic et al. 2010)   | AP-PCR     | 30                                         | 73%                                                                           |                                                                                          |
|                                                                                                              | (Thongprasert, Yang et al. 2016)  | qRT-PCR    | 349:<br>195 adenocarcinoma<br>116 squamous | 49%:<br>36% adenocarcinomas<br>80% squamous                                   |                                                                                          |
|                                                                                                              | (Pan, Su et al. 2017)             | qRT-PCR    | 192:<br>121 adenocarcinoma<br>71 squamous  | 31% in adenocarcinomas<br>59% in squamous                                     | No association with OS                                                                   |
| Head and neck SCC                                                                                            | (Figueiredo, Mamede et al. 2006)  | RT-PCR     | 33 tumours<br>15 lymph node tissue         | 42% of tumours<br>4/5 lymph node metastases                                   |                                                                                          |
|                                                                                                              | (Cuffel, Rivals et al. 2011)      | RT-PCR     | 57                                         | 49%                                                                           | No impact on survival                                                                    |
| Salivary duct carcinoma                                                                                      | (Xu, Jungbluth et al. 2019)       | IHC        | 40                                         | 82% (mostly cytoplasmic staining)                                             | No impact on metastasis                                                                  |
| Renal cell carcinoma                                                                                         | (Neumann, Engelsberg et al. 1998) | RT-PCR     | 39 (37 primary tumour, 2 metastases)       | 40% (predominantly clear cell carcinoma)                                      | No correlation with TNM or tumour grade                                                  |
| Breast cancer                                                                                                | (Ikeda, Lethé et al. 1997)        | RT-PCR     | 169                                        | 27%                                                                           |                                                                                          |
|                                                                                                              | (Epping, Hart et al. 2008)        | Microarray | 295                                        | High PRAME in 33%: correlated with low differentiation and ER negative status | High PRAME expression correlated with shorter OS and shorter MFS                         |
|                                                                                                              | (Doolan, Clynes et al. 2008)      | RT-PCR     | 103                                        | 53%                                                                           | PRAME + tumours have shorter DFS and OS; in the adjuvant chemotherapy group: shorter RFS |

|                                   |                                  |                                                |                                           |                                                                                           |                                                                                                                                    |
|-----------------------------------|----------------------------------|------------------------------------------------|-------------------------------------------|-------------------------------------------------------------------------------------------|------------------------------------------------------------------------------------------------------------------------------------|
|                                   | (Naik, Thomas et al. 2021)       | RNASeq                                         | 1066 (TCGA)                               |                                                                                           | High PRAME expression associated with shorter OS (also in subgroup with immune-unfavourable tumours)                               |
| Synovial sarcoma                  | (Iura, Maekawa et al. 2017)      | IHC<br>qRT-PCR                                 | 108 for IHC<br>20 for qRT-PCR             | IHC: 86%<br>qRT-PCR: 100%                                                                 | No correlation with survival                                                                                                       |
|                                   | (Luk, van der Steen et al. 2018) | mRNA microarray<br>PRAME specific<br>mRNA FISH | 45                                        | mRNA: 100%<br>FISH: 100% (85% homogeneous)                                                |                                                                                                                                    |
| Myxoid and round cell liposarcoma | (Iura, Kohashi et al. 2015)      | IHC<br>Western blot<br>qRT-PCR                 | 93 for IHC<br>19 for WB<br>20 for qRT-PCR | IHC: 90%<br>WB: 10/19<br>qRT-PCR: 100%                                                    | Tumours with high PRAME expression have shorter survival                                                                           |
|                                   | (Hemminger, Toland et al. 2014)  | IHC<br>qPCR                                    | 37 for IHC<br>8 for qPCR                  | IHC: 100%<br>qPCR: 8/8 (6 high, 2 low)                                                    |                                                                                                                                    |
| Osteosarcoma                      | (Toledo, Zago et al. 2011)       | RT-PCR                                         | 29                                        | 68%                                                                                       |                                                                                                                                    |
|                                   | (Tan, Zou et al. 2012)           | IHC<br>RT-PCR                                  | 69 for IHC<br>36 for RT-PCR               | IHC: 73%<br>RT-PCR: higher PRAME expression in tumour than muscle tissue                  | Strong PRAME expression correlated to poor prognosis and predicted lung metastases                                                 |
|                                   | (Zou, Shen et al. 2012)          | qRT-PCR                                        | 28                                        | 96%                                                                                       |                                                                                                                                    |
| Neuroblastoma                     | (Oberthuer, Hero et al. 2004)    | RT-PCR<br>Northern blot<br>qPCR                | 94                                        | RT-PCR: 93%<br>NB: higher score in advanced stage<br>qPCR: 100%, higher in advanced stage | RT-PCR and NB: PRAME expression correlated with worse survival (not significant)<br>qPCR: tumours with higher PRAME have worse EFS |
| Medulloblastoma                   | (Orlando, Miele et al. 2018)     | qRT-PCR<br>IHC                                 | 60 for RT-PCR<br>40 for IHC               | RT-PCR: 82% expression higher than normal tissue<br>IHC: high PRAME expression            | Tumours with high PRAME have worse OS                                                                                              |
| Epithelial ovarian cancer         | (Partheen, Levan et al. 2006)    | Microarray<br>qPCR                             | 54 for microarray*<br>20 for qPCR*        |                                                                                           | Lower PRAME expression in survivors than in deceased cases                                                                         |
|                                   | (Partheen, Levan et al. 2008)    | qPCR<br>Western blot<br>IHC                    | 19 for qPCR*<br>43 for WB*<br>43 for IHC* |                                                                                           | qPCR and WB: higher PRAME in deceased cases than in survivors                                                                      |

|                                                                                                                                                                                                                                                                                                                                                                                                                                                    |                                |                                                 |                                                    |                                                                                                         |                                                                                                                                                                    |
|----------------------------------------------------------------------------------------------------------------------------------------------------------------------------------------------------------------------------------------------------------------------------------------------------------------------------------------------------------------------------------------------------------------------------------------------------|--------------------------------|-------------------------------------------------|----------------------------------------------------|---------------------------------------------------------------------------------------------------------|--------------------------------------------------------------------------------------------------------------------------------------------------------------------|
|                                                                                                                                                                                                                                                                                                                                                                                                                                                    |                                |                                                 |                                                    |                                                                                                         | Kaplan-Meier: tumours with high PRAME have lower survival                                                                                                          |
|                                                                                                                                                                                                                                                                                                                                                                                                                                                    | (Partheen, Levan et al. 2009)  | qPCR<br>Western blot                            | 30 for qPCR <sup>†</sup><br>98 for WB <sup>†</sup> |                                                                                                         | No difference in PRAME between survivors and deceased cases                                                                                                        |
|                                                                                                                                                                                                                                                                                                                                                                                                                                                    | (Zhang, Barger et al. 2016)    | qRT-PCR<br>TCGA data‡:<br>microarray,<br>RNAseq | 119                                                | qRT-PCR: 60% PRAME overexpression compared to normal tissue                                             | TCGA: tumours with high PRAME (microarray) have better OS and PFS                                                                                                  |
| Gastric cancer                                                                                                                                                                                                                                                                                                                                                                                                                                     | (Baba, Kanda et al. 2020)      | qRT-PCR                                         | 300                                                | 65% (correlated to differentiated phenotype)                                                            | Higher PRAME in stage IV tumours with liver metastases.<br>High PRAME expression predictive of liver recurrence.<br>Tumours with high PRAME have lower OS and DFS. |
| Urothelial carcinoma                                                                                                                                                                                                                                                                                                                                                                                                                               | (Dyrskjot, Zieger et al. 2012) | qRT-PCR                                         | 350                                                | 20% (correlated to high stage and grade)                                                                | No influence on survival.<br>Tumours with PRAME expression have worse response to chemotherapy                                                                     |
| Hepatocellular carcinoma                                                                                                                                                                                                                                                                                                                                                                                                                           | (Zhu, Wang et al. 2018)        | Western blot<br>IHC<br>qRT-PCR                  | 96                                                 | PRAME upregulated in cancer compared to normal tissue (correlated to tumour size, stage and metastases) | Tumours with high PRAME have worse survival                                                                                                                        |
|                                                                                                                                                                                                                                                                                                                                                                                                                                                    | (Oyama, Kanki et al. 2017)     | qRT-PCR                                         | 100                                                | 27% (correlated with higher stage and number of tumours)                                                | Cases with PRAME + non-tumour tissue have shorter OS and DFS                                                                                                       |
| <p>NSCLC = Non small cell lung cancer, SCC = squamous cell carcinoma, ER = estrogen receptor, GEP = gene expression profiling, OS = overall survival, MFS = metastasis-free survival, DFS = disease-free survival, RFS = relapse-free survival, EFS = event-free survival</p> <p>*= stage III serous papillary adenocarcinoma<br/> <sup>†</sup>= stage III-IV serous papillary adenocarcinoma<br/> <sup>‡</sup>= only high grade serous cancer</p> |                                |                                                 |                                                    |                                                                                                         |                                                                                                                                                                    |

| Table S3. Proportion of haematological malignancies expressing PRAME and prognostic significance of PRAME expression. |                                      |                         |         |                                           |                                                                                                 |
|-----------------------------------------------------------------------------------------------------------------------|--------------------------------------|-------------------------|---------|-------------------------------------------|-------------------------------------------------------------------------------------------------|
| Tumour                                                                                                                | Paper                                | Method                  | Samples | Expression                                | Prognosis                                                                                       |
| Acute myelogenous leukaemia                                                                                           | (Van Baren, Chambost et al. 1998)    | RT-PCR                  | 108     | 35% (associated with t(8;21)*, t(15;17)*) |                                                                                                 |
|                                                                                                                       | (Greiner, Ringhoffer et al. 2000)    | RT-PCR                  | 34      | 47% high, 12% low, 41% negative           |                                                                                                 |
|                                                                                                                       | (Matsushita, Ikeda et al. 2001)      | Semiquantitative RT-PCR | 35      | 49%                                       |                                                                                                 |
|                                                                                                                       | (Greiner, Schmitt et al. 2006)       | cDNA microarray RT-PCR  | 116     | Higher PRAME in t(8;21)* and t(15;17)*    | Cases with high PRAME expression have better survival (not significant)                         |
| Childhood acute myelogenous leukaemia                                                                                 | (Steinbach, Hermann et al. 2002)     | RT-PCR                  | 50      | 62% (higher in t(8;21))*                  | Cases with high PRAME have higher OS and DFS, lower WBC count and blast percentage              |
| Acute lymphoblastic leukaemia                                                                                         | (Van Baren, Chambost et al. 1998)    | RT-PCR                  | 90      | 15%                                       |                                                                                                 |
|                                                                                                                       | (Watari, Tojo et al. 2000)           | RT-PCR                  |         | PRAME positivity in Ph-positive cases†    |                                                                                                 |
|                                                                                                                       | (Matsushita, Ikeda et al. 2001)      | RT-PCR                  | 14      | 64%                                       |                                                                                                 |
| Childhood acute lymphoblastic leukaemia                                                                               | (Steinbach, Viehmann et al. 2002)    | RT-PCR                  | 50      | 42% overexpression                        | Cases with high PRAME have better survival (not significant), lower WBC count (not significant) |
| Chronic myelogenous leukaemia                                                                                         | (Watari, Tojo et al. 2000)           | RT-PCR                  |         | PRAME positivity in blastic crisis        |                                                                                                 |
|                                                                                                                       | (Matsushita, Ikeda et al. 2001)      | Semiquantitative RT-PCR | 32      | 42%                                       |                                                                                                 |
| Chronic lymphoblastic leukaemia                                                                                       | (Proto-Siqueira, Falcão et al. 2003) | Semiquantitative RT-PCR | 38      | 16%                                       |                                                                                                 |
| Mantle cell lymphoma                                                                                                  | (Proto-Siqueira, Falcão et al. 2003) | Semiquantitative RT-PCR | 16      | 44%                                       |                                                                                                 |

|                                                                                                                                                                                                                                                                                                                                                                                                                                                                                                           |                                           |                         |                                  |                                                                    |                                                                                                                |
|-----------------------------------------------------------------------------------------------------------------------------------------------------------------------------------------------------------------------------------------------------------------------------------------------------------------------------------------------------------------------------------------------------------------------------------------------------------------------------------------------------------|-------------------------------------------|-------------------------|----------------------------------|--------------------------------------------------------------------|----------------------------------------------------------------------------------------------------------------|
| Non-Hodgkin lymphoma                                                                                                                                                                                                                                                                                                                                                                                                                                                                                      | (Van Baren, Chambost et al. 1998)         | RT-PCR                  | 20                               | 3/20                                                               |                                                                                                                |
|                                                                                                                                                                                                                                                                                                                                                                                                                                                                                                           | (Matsushita, Ikeda et al. 2001)           | Semiquantitative RT-PCR | 13                               | 23%                                                                |                                                                                                                |
|                                                                                                                                                                                                                                                                                                                                                                                                                                                                                                           | (Mitsuhashi, Masuda et al. 2014)          | IHC<br>qRT-PCR          | 160 for IHC‡<br>20 for qRT-PCR‡  | IHC§: 68% 0, 11% 1+, 8% 2+, 13% 3+<br>qRT-PCR: correlated with IHC | Cases with 3+ staining have worse OS and PFS                                                                   |
|                                                                                                                                                                                                                                                                                                                                                                                                                                                                                                           | (Takata, Chong et al. 2022)               | IHC<br>RNA-Seq          | 347 for IHC‡<br>322 for RNA-Seq‡ | IHC: 30%                                                           | Cases with high PRAME mRNA expression have longer DSS                                                          |
| Hodgkin lymphoma                                                                                                                                                                                                                                                                                                                                                                                                                                                                                          | (Ercolak, Paydas et al. 2015)             | IHC<br>Real time PCR    | 82                               | IHC: 18%<br>PCR: 10%                                               | Cases with high PRAME by PCR have shorter DFS and OS                                                           |
| Multiple myeloma                                                                                                                                                                                                                                                                                                                                                                                                                                                                                          | (Van Baren, Chambost et al. 1998)         | RT-PCR                  | 9                                | 2/9                                                                |                                                                                                                |
|                                                                                                                                                                                                                                                                                                                                                                                                                                                                                                           | (Pellat-Deceunynck, Mellerin et al. 2000) | RT-PCR                  | 21                               | 52%                                                                |                                                                                                                |
| Myelodysplastic syndromes                                                                                                                                                                                                                                                                                                                                                                                                                                                                                 | (Huang, Wang et al. 2019)                 | RQ-PCR                  | 1110                             | 67% overexpression                                                 | Cases with overexpression have more blasts, worse cytogenetics, higher risk of AML evolution, worse OS and PFS |
| <p>OS = overall survival, DFS = disease-free survival, PFS = progression-free survival, DSS = disease-specific survival, WBC = white blood cell, Ph = Philadelphia chromosome</p> <p>*= subtype with good prognosis</p> <p>†= subtype with bad prognosis</p> <p>‡= diffuse large B cell lymphoma</p> <p>§= IHC score: 0 if &lt;25% positive cells, 1+ if 25-50% positive cells, 2+ if 50-75% positive cells, 3+ if &gt;75% positive cells</p> <p>   = myelodysplastic syndromes with thrombocytopenia</p> |                                           |                         |                                  |                                                                    |                                                                                                                |





Table S4. Distribution of clinical, histopathological, and genetic features in PRAME-positive and PRAME-negative UM (D3 UM patients from the LUMC cohort, total 24).

| Feature                         | Patients, No. (%)§           |                             | p value |
|---------------------------------|------------------------------|-----------------------------|---------|
|                                 | PRAME negative<br>n=16 (67%) | PRAME positive<br>n=8 (33%) |         |
| <b>Sex</b>                      |                              |                             |         |
| Male                            | 10 (62%)                     | 6 (75%)                     | 0.67*   |
| Female                          | 6 (37%)                      | 2 (25%)                     |         |
| Age at enucleation              | 57.6 (13-82)                 | 51.7 (34-73)                | 0.27‡   |
| Median Follow up (months)       | 154.5 (10-219)               | 98 (17-176)                 | 0.21‡   |
| Largest Basal Diameter          | 11.3 (9-17)                  | 15.1 (13-18)                | 0.001‡  |
| Thickness                       | 6.9 (2-11)                   | 7.8 (2-12)                  | 0.4‡    |
| Mitotic count                   | 6.1 (1-23)                   | 5.6 (1-11)                  | 0.93‡   |
| <b>Cell type</b>                |                              |                             |         |
| Spindle                         | 7 (44%)                      | 6 (75%)                     | 0.21*   |
| Epithelioid-mixed               | 9 (56%)                      | 2 (25%)                     |         |
| <b>Ciliary body involvement</b> |                              |                             |         |
| No                              | 13 (81%)                     | 6 (75%)                     | 1.0*    |
| Yes                             | 3 (19%)                      | 2 (25%)                     |         |
| <b>Extrascleral extension</b>   |                              |                             |         |
| None/superficial                | 10 (62%)                     | 2 (25%)                     | 0.19*   |
| Deep/total                      | 6 (37%)                      | 6 (75%)                     |         |
| <b>TNM stage</b>                |                              |                             |         |
| I-IIIB                          | 14 (87%)                     | 4 (50%)                     | 0.13*   |
| IIIA-IIIC                       | 2 (12%)                      | 4 (50%)                     |         |
| <b>Tumour pigmentation</b>      |                              |                             |         |
| Light                           | 15 (94%)                     | 4 (50%)                     | 0.028*  |
| Dark                            | 1 (6%)                       | 4 (50%)                     |         |
| <b>8q status</b>                |                              |                             |         |
| Normal                          | 9 (60%)                      | 1 (12%)                     | 0.04†   |
| Gain                            | 5 (33%)                      | 4 (50%)                     |         |
| Amplification                   | 1 (7%)                       | 3 (37%)                     |         |
| <b>6p status</b>                |                              |                             |         |
| Normal                          | 6 (37%)                      | 0 (0%)                      | 0.07*   |
| Gain                            | 10 (62%)                     | 8 (100%)                    |         |
| <b>BAP1 IHC expression</b>      |                              |                             |         |
| Positive                        | 12 (80%)                     | 7 (100%)                    | 0.52*   |
| Negative                        | 3 (20%)                      | 0 (0%)                      |         |

\*: Fisher's exact test

†: Likelihood ratio

‡: Mann Whitney U test

§: Percentages are rounded and may not total 100

||: Percentages were calculated excluding missing data

Table S5. Distribution of clinical, histopathological, and genetic features in PRAME-positive and PRAME-negative UM (M3 UM patients from the LUMC cohort, total 40).

| Feature                         | Patients, No. (%)    #         |                                | p value |
|---------------------------------|--------------------------------|--------------------------------|---------|
|                                 | PRAME negative<br>n=19 (47.5%) | PRAME positive<br>n=21 (52.5%) |         |
| <b>Sex</b>                      |                                |                                |         |
| Male                            | 9 (47%)                        | 8 (38%)                        | 0.55*   |
| Female                          | 10 (53%)                       | 13 (62%)                       |         |
| Age at enucleation              | 63.1 (27-85)                   | 64 (36-88)                     | 0.95§   |
| Median Follow up (months)       | 52 (9-178)                     | 30 (2-145)                     | 0.20§   |
| Largest Basal Diameter          | 13.3 (8-20)                    | 14.7 (9-30)                    | 0.35§   |
| Thickness                       | 7.95 (3-12)                    | 8.2 (2-12)                     | 0.74§   |
| Mitotic count                   | 6.9 (1-33)                     | 6.6 (0-20)                     | 0.71§   |
| <b>Cell type</b>                |                                |                                |         |
| Spindle                         | 7 (37%)                        | 2 ( 9%)                        | 0.06†   |
| Epithelioid-mixed               | 12 (63%)                       | 19 (90%)                       |         |
| <b>Ciliary body involvement</b> |                                |                                |         |
| No                              | 13 (68%)                       | 7 (33%)                        | 0.03*   |
| Yes                             | 6 (32%)                        | 14 (67%)                       |         |
| <b>Extrascleral extension</b>   |                                |                                |         |
| None/superficial                | 11 (58%)                       | 12 (58%)                       | 0.96*   |
| Deep/total                      | 8 (42%)                        | 9 (42%)                        |         |
| <b>TNM stage</b>                |                                |                                |         |
| I-IIIB                          | 11 (65%)                       | 7 (33%)                        | 0.05*   |
| IIIA-IIIC                       | 6 (35%)                        | 14 (67%)                       |         |
| <b>Tumour pigmentation</b>      |                                |                                |         |
| Light                           | 13 (68%)                       | 11 (55%)                       | 0.39*   |
| Dark                            | 6 (32%)                        | 9 (45%)                        |         |
| <b>8q status</b>                |                                |                                |         |
| Normal                          | 1 ( 5%)                        | 2 ( 9%)                        | 0.01‡   |
| Gain                            | 11 (58%)                       | 3 (14%)                        |         |
| Amplification                   | 7 (37%)                        | 16 (76%)                       |         |
| <b>6p status</b>                |                                |                                |         |
| Normal                          | 17 (89%)                       | 20 (95%)                       | 0.57†   |
| Gain                            | 2 (10%)                        | 1 ( 5%)                        |         |
| <b>BAP1 IHC expression</b>      |                                |                                |         |
| BAP1 positive                   | 12 (80%)                       | 7 (100%)                       | 0.68†   |
| BAP1 negative                   | 3 (20%)                        | 0 ( 0%)                        |         |

\*: Pearson's  $\chi^2$  test

†: Fisher's exact test

‡: Likelihood ratio

§: Mann Whitney U test

||: Percentages are rounded and may not total 100

#: Percentages were calculated excluding missing data

Table S6. Distribution of clinical, histopathological, and genetic features in UM with low PRAME and high PRAME (D3 UM patients from the TCGA study, total 38).

| Feature                         | Patients, No. (%)    # |                       | p value |
|---------------------------------|------------------------|-----------------------|---------|
|                                 | Low PRAME n=21 (55%)   | High PRAME n=17 (45%) |         |
| <b>Sex</b>                      |                        |                       |         |
| Male                            | 12 (57%)               | 9 (53%)               | 0.80*   |
| Female                          | 9 (43%)                | 8 (47%)               |         |
| Age at enucleation              | 62.57 (39-79)          | 52.82 (22-78)         | 0.05§   |
| Largest Basal Diameter          | 15.18 (8-25)           | 16.59 (11-21)         | 0.27§   |
| Thickness                       | 10.21 (6-16)           | 10.40 (6-13)          | 0.72§   |
| <b>Mitotic count</b>            |                        |                       |         |
| 0-5                             | 20 (95%)               | 14 (82%)              | 0.045‡  |
| >5-10                           | 0 ( 0%)                | 3 (18%)               |         |
| >11                             | 1 ( 5%)                | 0 ( 0%)               |         |
| <b>Cell type</b>                |                        |                       |         |
| Spindle cell                    | 18 (86%)               | 13 (76%)              | 0.68†   |
| Epithelioid-mixed cell          | 3 (14%)                | 4 (24%)               |         |
| <b>Ciliary body involvement</b> |                        |                       |         |
| No                              | 18 (86%)               | 13 (76%)              | 0.68†   |
| Yes                             | 3 (14%)                | 4 (23%)               |         |
| <b>Extrascleral extension</b>   |                        |                       |         |
| None                            | 21 (100%)              | 16 (94%)              | 0.48‡   |
| <5 mm                           | 0 ( 0%)                | 1 ( 6%)               |         |
| >= 5 mm                         | 0 ( 0%)                | 0 ( 0%)               |         |
| <b>TNM stage</b>                |                        |                       |         |
| I-II B                          | 14 (67%)               | 9 (53%)               | 0.39*   |
| III A-III C                     | 7 (33%)                | 8 (47%)               |         |
| <b>Tumour pigmentation</b>      |                        |                       |         |
| Light                           | 16 (76%)               | 7 (76%)               | 0.080‡  |
| Mixed                           | 3 (14%)                | 7 (41%)               |         |
| Heavy                           | 2 (10%)                | 3 (18%)               |         |
| <b>8q status</b>                |                        |                       |         |
| Normal                          | 16 (76%)               | 2 (12%)               | <0.001‡ |
| Gain                            | 2 ( 9%)                | 11 (65%)              |         |
| Amplification                   | 3 (14%)                | 4 (23%)               |         |
| <b>6p status</b>                |                        |                       |         |
| Normal                          | 5 (24%)                | 0 ( 0%)               | 0.05†   |
| Gain                            | 16 (76%)               | 17 (100%)             |         |
| <b>BAP1 expression</b>          |                        |                       |         |
| BAP1 high                       | 20 (95%)               | 17 (100%)             | 1.00†   |
| BAP1 low                        | 1 ( 5%)                | 0 ( 0%)               |         |

\*: Pearson's  $\chi^2$  test

†: Fisher's exact test

‡: Likelihood ratio

§: Mann Whitney U test

||: Percentages are rounded and may not total 100

#: Percentages were calculated excluding missing data

Table S7. Distribution of clinical, histopathological, and genetic features in UM with low PRAME and high PRAME (M3 UM patients from the TCGA study, total 42).

| Feature                         | Patients, No. (%)    #  |                          | p value |
|---------------------------------|-------------------------|--------------------------|---------|
|                                 | Low PRAME n=19<br>(45%) | High PRAME n=23<br>(56%) |         |
| <b>Sex</b>                      |                         |                          |         |
| Male                            | 10 (53%)                | 14 (61%)                 | 0.59*   |
| Female                          | 9 (47%)                 | 9 (39%)                  |         |
| Age at enucleation              | 64.89 (41-86)           | 64.65 (46-86)            | 0.96§   |
| Largest Basal Diameter          | 16.17 (12-25)           | 18.20 (12-25)            | 0.06§   |
| Thickness                       | 11.14 (7-15)            | 11.29 (4-16)             | 0.71‡   |
| <b>Mitotic count</b>            |                         |                          |         |
| 0-5                             | 12 (63%)                | 17 (74%)                 | 0.71†   |
| >5-10                           | 4 (21%)                 | 4 (17%)                  |         |
| >11                             | 3 (16%)                 | 2 ( 9%)                  |         |
| <b>Cell type</b>                |                         |                          |         |
| Spindle cell                    | 8 (42%)                 | 4 (17%)                  | 0.08*   |
| Epithelioid-mixed cell          | 11 (58%)                | 19 (83%)                 |         |
| <b>Ciliary body involvement</b> |                         |                          |         |
| No                              | 10 (53%)                | 13 (54%)                 | 0.80*   |
| Yes                             | 9 (47%)                 | 10 (45%)                 |         |
| <b>Extrascleral extension</b>   |                         |                          |         |
| None                            | 19 (100%)               | 18 (77%)                 | 0.04‡   |
| <5 mm                           | 0 ( 0%)                 | 2 ( 9%)                  |         |
| >= 5 mm                         | 0 ( 0%)                 | 3 (14%)                  |         |
| <b>TNM stage</b>                |                         |                          |         |
| I-II B                          | 7 (37%)                 | 6 (23%)                  | 0.45*   |
| III A-IV                        | 12 (63%)                | 17 (77%)                 |         |
| <b>Tumour pigmentation</b>      |                         |                          |         |
| Light                           | 12 (63%)                | 4 (17%)                  | 0.007‡  |
| Mixed                           | 4 (21%)                 | 13 (57%)                 |         |
| Heavy                           | 3 (16%)                 | 6 (26%)                  |         |
| <b>8q status</b>                |                         |                          |         |
| Normal                          | 3 (16%)                 | 0 ( 0%)                  | 0.007‡  |
| Gain                            | 9 (47%)                 | 5 (18%)                  |         |
| Amplification                   | 7 (37%)                 | 18 (82%)                 |         |
| <b>6p status</b>                |                         |                          |         |
| Normal                          | 16 (84%)                | 14 (59%)                 | 0.10*   |
| Gain                            | 3 (16%)                 | 9 (41%)                  |         |
| <b>BAP1 expression</b>          |                         |                          |         |
| BAP1 high                       | 1 ( 5%)                 | 2 ( 9%)                  | 1.00†   |
| BAP1 low                        | 18 (95%)                | 21 (92%)                 |         |

\*: Pearson's  $\chi^2$  test

†: Fisher's exact test

‡: Likelihood ratio

§: Mann Whitney U test

||: Percentages are rounded and may not total 100

#: Percentages were calculated excluding missing data

Table S8: Distribution of BAP1, SF3B1 and EIF1AX mutation in UM with respect to PRAME expression in the TCGA cohort

|              | Total TCGA |            |         | TCGA – D3 |            |          | TCGA – M3 |            |           |
|--------------|------------|------------|---------|-----------|------------|----------|-----------|------------|-----------|
|              | PRAME-low  | PRAME-high | p value | PRAME-low | PRAME-high | p value  | PRAME-low | PRAME-high | p value   |
| BSE mutation |            |            |         |           |            |          |           |            |           |
| EIF1AX       | 8 (31%)    | 1 (3%)     | 0.002‡  | 8 (89%)   | 1 (7%)     | < 0.001† | /         | /          | /         |
| SF3B1        | 3 (12%)    | 13 (27%)   |         | 1 (11%)   | 13 (93%)   |          | 2 (12%)   | 0 (0%)     | 0.20†     |
| BAP1         | 15 (58%)   | 20 (58%)   |         | /         | /          |          | /         | 15 (88%)   | 20 (100%) |

‡Likelihood ratio

†Fisher's exact test

Table S9: Distribution of EMT markers in PRAME positive and PRAME negative tumors in a cohort of 64 UM patients, Mann Whitney U test.

|               | PRAME negative      | PRAME positive      | <i>p</i> value |
|---------------|---------------------|---------------------|----------------|
| SNAI2 probe 1 | 8.25 ( $\pm 0.6$ )  | 8.07 ( $\pm 0.6$ )  | 0.36           |
| SNAI2 probe 2 | 9.55 ( $\pm 0.7$ )  | 9.41 ( $\pm 0.6$ )  | 0.50           |
| STAT3 probe 1 | 8.02 ( $\pm 0.4$ )  | 8.02 ( $\pm 0.4$ )  | 0.90           |
| STAT3 probe 2 | 9.07 ( $\pm 0.5$ )  | 9.03 ( $\pm 0.5$ )  | 0.86           |
| ZEB2          | 7.73 ( $\pm 0.3$ )  | 7.59 ( $\pm 0.2$ )  | 0.02           |
| SOX10         | 11.95 ( $\pm 0.4$ ) | 11.97 ( $\pm 0.4$ ) | 0.89           |

Table S10: Distribution of infiltrate markers in PRAME positive and PRAME negative tumors in a 24 D3 and 40 M3 UM patients, Mann Whitney U test.

|            | Disomy 3 (24)       |                     |      | Monosomy 3 (40)     |                     |       |
|------------|---------------------|---------------------|------|---------------------|---------------------|-------|
|            | PRAME negative      | PRAME positive      | p    | PRAME negative      | PRAME positive      | P     |
| CD3        | 6.85 ( $\pm 1.3$ )  | 6.86 ( $\pm 0.4$ )  | 0.13 | 6.90 ( $\pm 0.8$ )  | 7.64 ( $\pm 1.2$ )  | 0.01  |
| CD4        | 6.54 ( $\pm 0.4$ )  | 6.73 ( $\pm 0.3$ )  | 0.01 | 6.60 ( $\pm 0.2$ )  | 6.77 ( $\pm 0.3$ )  | 0.10  |
| CD8A       | 6.95 ( $\pm 1.6$ )  | 6.90 ( $\pm 0.6$ )  | 0.22 | 6.98 ( $\pm 1.0$ )  | 7.88 ( $\pm 1.3$ )  | 0.02  |
| CD68       | 10.06 ( $\pm 0.9$ ) | 11.18 ( $\pm 1.0$ ) | 0.01 | 10.80 ( $\pm 0.6$ ) | 11.32 ( $\pm 0.8$ ) | 0.04  |
| HLA-A pr 1 | 10.62 ( $\pm 0.7$ ) | 11.02 ( $\pm 0.8$ ) | 0.14 | 11.74 ( $\pm 0.7$ ) | 12.05 ( $\pm 0.7$ ) | 0.005 |
| HLA-A pr 2 | 13.22 ( $\pm 0.8$ ) | 13.31 ( $\pm 0.7$ ) | 0.33 | 13.97 ( $\pm 0.6$ ) | 14.40 ( $\pm 0.4$ ) | 0.006 |
| HLA-B      | 10.31 ( $\pm 1.7$ ) | 9.88 ( $\pm 1.2$ )  | 0.58 | 11.53 ( $\pm 1.4$ ) | 12.49 ( $\pm 1.2$ ) | 0.02  |

| Table S11a. Most upregulated genes in 29 PRAME-positive UM vs 35 PRAME-negative UM |          |           |          |           |            |          |                                      |          |                                                                                                                                                                                          |                                                                                                                   |
|------------------------------------------------------------------------------------|----------|-----------|----------|-----------|------------|----------|--------------------------------------|----------|------------------------------------------------------------------------------------------------------------------------------------------------------------------------------------------|-------------------------------------------------------------------------------------------------------------------|
| Symbol                                                                             | logFC    | AveExpr   | t        | P.Value   | adj.P.Val  | B        | Gene name                            | Location | Role in cancer                                                                                                                                                                           | Role in UM                                                                                                        |
| PUF60                                                                              | 0.625558 | 11.582971 | 5.719239 | 3.006E-07 | 0.00097149 | 6.424361 | Binding Splicing Factor 60           | 8q24.3   |                                                                                                                                                                                          |                                                                                                                   |
| DGAT1                                                                              | 0.637533 | 8.1651707 | 5.255655 | 1.791E-06 | 0.00289424 | 4.822221 | Diacylglycerol O-Acyltransferase 1   | 8q24.3   | High expression correlated with poor survival in gastric cancer; high expression protects cancer cells from oxidative damage and improves FA storage (Cheng 2020, He 2021, Wilcock 2022) |                                                                                                                   |
| NAPRT1                                                                             | 0.786418 | 9.5010336 | 5.162251 | 2.551E-06 | 0.00374742 | 4.504817 | Nicotinate Phosphoribosyltransferase | 8q24.3   | Deficiency makes cancer cells more susceptible to treatment with NAPMT inhibitors with nicotinic acid (Watson 2009, Cerna 2012, Shames 2013)                                             |                                                                                                                   |
| SLC52A2                                                                            | 0.748486 | 9.3376813 | 5.049801 | 3.894E-06 | 0.00479878 | 4.125463 | Solute Carrier Family 52 Member 2    | 8q24.3   | Upregulated, linked to a worse survival and increase in T cell exhaustion markers and M2 macrophages (Zhang 2022)                                                                        | Upregulated, linked to a worse survival and increase in T cell exhaustion markers and M2 macrophages (Zhang 2022) |
| CEBPB                                                                              | 0.65662  | 10.522645 | 5.032253 | 4.158E-06 | 0.00479878 | 4.066551 | CCAAT Enhancer Binding Protein Beta  | 20q13.13 | Upregulated in breast cancer compared to normal tissue (Matherne 2023)                                                                                                                   |                                                                                                                   |
| OPLAH                                                                              | 0.6464   | 8.5489751 | 4.815561 | 9.289E-06 | 0.00819323 | 3.345868 | 5-Oxoprolinase, ATP-Hydrolysing      | 8q24.3   |                                                                                                                                                                                          |                                                                                                                   |
| EPHX1                                                                              | 0.638304 | 8.0740934 | 4.798138 | 9.903E-06 | 0.00819323 | 3.288493 | Epoxide Hydrolase 1                  | 1q42.12  | Associated with ncreased recurrence rate and a worse prognosis in AML (Cheng 2019).                                                                                                      |                                                                                                                   |
| DNASE1L3                                                                           | 0.706244 | 7.5942977 | 4.384255 | 4.401E-05 | 0.01687724 | 1.953754 | Deoxyribonuclease 1 Like 3           | 3p14.3   | Down-regulated in several types of cancer,                                                                                                                                               |                                                                                                                   |



|        |          |           |          |           |            |          |                                                                         |          |                                                                                                                                                                                  |                                                                                                                                 |
|--------|----------|-----------|----------|-----------|------------|----------|-------------------------------------------------------------------------|----------|----------------------------------------------------------------------------------------------------------------------------------------------------------------------------------|---------------------------------------------------------------------------------------------------------------------------------|
|        |          |           |          |           |            |          |                                                                         |          | but correlated with immune infiltration (Deng 2021).                                                                                                                             |                                                                                                                                 |
| MGAT1  | 0.620343 | 10.553904 | 4.359655 | 4.8E-05   | 0.01723484 | 1.876258 | Alpha-1,3-Mannosyl-Glycoprotein 2-Beta-N-Acetylglucosaminyl-transferase | 5q35.3   | increases progression and invasiveness of cervical cancer, prostate cancer and hepatocellular carcinoma cell lines (Zavareh 2012, Akiva 2018).                                   |                                                                                                                                 |
| APOC1  | 1.403344 | 10.779708 | 4.298809 | 5.944E-05 | 0.0188526  | 1.68553  | Apolipoprotein C1                                                       | 19q13.32 | Highly expressed in several types of cancers (e.g. colorectal cancer, gastric cancer and renal cell carcinoma), associated with a worse prognosis (Ren 2019, Yi 2019, Cui 2020). |                                                                                                                                 |
| LY6E   | 0.683731 | 11.853244 | 4.112825 | 0.0001132 | 0.02257851 | 1.111359 | Lymphocyte Antigen 6 Family Member E                                    | 8q24.3   | Overexpressed, linked to a worse prognosis in several cancer types, acts through TGF- $\beta$ and PTEN-PI3K/AKT pathways (Upadhyay 2019, AlHossiny 2016, Yeom 2016)              |                                                                                                                                 |
| PARP10 | 0.691261 | 8.8007201 | 4.031011 | 0.0001496 | 0.02402675 | 0.863195 | Poly(ADP-Ribose) Polymerase Family Member 10                            | 8q24.3   | Promotes cell proliferation <i>in vitro</i> and tumour formation <i>in vivo</i> from HeLa cells (Schleicher 2018)                                                                | Increased in UM samples; PARP inhibitor increases the efficacy of dacarbazine treatment on UM PDX and cell lines (Koning 2019). |
| CD68   | 0.827099 | 10.836711 | 3.963273 | 0.0001881 | 0.0260977  | 0.659866 | CD68 Molecule                                                           | 17p13.1  | High CD68 correlated with an adverse prognosis in glioblastoma, kidney renal clear cell carcinoma, lower-grade glioma, liver hepatocellular                                      | Higher number of CD68+ macrophages correlated with worse prognosis and higher in M3 than D3 UM (Makitie 2001, Bronkhorst 2011)  |

|        |          |           |          |           |            |         |                                  |        |                                                                                                                                                 |                                                                                                                                                                                                                          |
|--------|----------|-----------|----------|-----------|------------|---------|----------------------------------|--------|-------------------------------------------------------------------------------------------------------------------------------------------------|--------------------------------------------------------------------------------------------------------------------------------------------------------------------------------------------------------------------------|
|        |          |           |          |           |            |         |                                  |        | carcinoma, lung squamous cell carcinoma, thyroid carcinoma, and thymoma and a favorable prognosis in kidney chromophobe. (Zhang 2022)           |                                                                                                                                                                                                                          |
| PTP4A3 | 0.818955 | 8.4462143 | 3.953231 | 0.0001945 | 0.02641256 | 0.62989 | Protein Tyrosine Phosphatase 4A3 | 8q24.3 | Upregulated in several cancer types, correlated to prognosis in ccRCC, papillary renal cancer and breast cancer (Den Hollander 2016, Song 2021) | Increased in UM cases with early metastases; it increased cell migration of UM cell lines <i>in vitro</i> and invasiveness <i>in vivo</i> (Laurent 2011). It interacts with MMP-14 and CRPM2 (Maacha 2016, Duciel 2019). |

| Table S11b. Most downregulated genes in 29 PRAME-positive UM vs 35 PRAME-negative UM |          |           |          |           |            |          |                                    |          |                                                                                                       |                                                                                                                                    |
|--------------------------------------------------------------------------------------|----------|-----------|----------|-----------|------------|----------|------------------------------------|----------|-------------------------------------------------------------------------------------------------------|------------------------------------------------------------------------------------------------------------------------------------|
| Symbol                                                                               | logFC    | AveExpr   | t        | P.Value   | adj.P.Val  | B        | Gene name                          | Location | Role in cancer                                                                                        | Role in UM                                                                                                                         |
| RPL13P5                                                                              | -0.96596 | 9.942009  | -6.14222 | 5.695E-08 | 0.00046004 | 7.916899 | Ribosomal Protein L13 Pseudogene 5 | 12p13.31 | Negatively correlated with HER2 in a comparison of HER2 breast cancer with normal tissue (Yang 2016). |                                                                                                                                    |
| CSNK2A2                                                                              | -0.64941 | 9.0176943 | -4.79164 | 1.014E-05 | 0.00819323 | 3.267104 | Casein Kinase 2 Alpha 2            | 16q21    | Different expression patterns and different roles in different cancers (Strum 2022)                   | Downregulated in UM cells compared to normal uveal melanocytes; lower in class 2 UM than in class 1 UM (Onken 2006, Bergeron 2012) |
| ID2                                                                                  | -0.74846 | 8.5848253 | -4.25107 | 7.021E-05 | 0.0199025  | 1.536875 | Inhibitor Of DNA Binding 2         | 2p25.1   | Overexpressed in colon and pancreatic                                                                 | Downregulated in class 2 UM compared to                                                                                            |

|             |          |           |          |           |            |          |                                     |          |                                                                                                                                  |                                                                                                                                  |
|-------------|----------|-----------|----------|-----------|------------|----------|-------------------------------------|----------|----------------------------------------------------------------------------------------------------------------------------------|----------------------------------------------------------------------------------------------------------------------------------|
|             |          |           |          |           |            |          |                                     |          | cancer; its downregulation promotes aggressiveness and invasion in breast, prostate and bladder cancer (Roschger 2017, Mao 2021) | class 1 UM; its downregulation can simulate a class 2 phenotype in UM cell lines <i>in vitro</i> and <i>in vivo</i> (Onken 2006) |
| SLCO4A1-AS1 | -0.95988 | 10.055974 | -4.1953  | 8.521E-05 | 0.02117138 | 1.3643   | SLCO4A1 Antisense RNA 1             | 20q13.33 | Promotes tumour progression in colorectal cancer and pancreatic cancer (Zhang 2022, Zhang 2022, Wu 2021)                         | Downregulated in UM with a high inflammatory infiltrate (Zhou 2022).                                                             |
| RPL21P28    | -0.6364  | 11.044889 | -4.03589 | 0.0001472 | 0.02402675 | 0.877925 | Ribosomal Protein L21 Pseudogene 28 | 1q32.3   |                                                                                                                                  |                                                                                                                                  |
| EFCAB1      | -0.8422  | 6.9796114 | -3.89938 | 0.000233  | 0.02851422 | 0.469917 | Calaxin                             | 8q11.21  | Downregulated in lung adenocarcinoma compared to normal lung tissue (Yang 2022)                                                  | Lower in metastatic UM compared to non-metastatic UM (Fagone 2017).                                                              |

Baba, H., M. Kanda, K. Sawaki, S. Umeda, T. Miwa, D. Shimizu, C. Tanaka, D. Kobayashi, M. Fujiwara, Y. Kodera and T. Fujii (2020). "PRAME as a Potential Biomarker for Liver Metastasis of Gastric Cancer." *Ann Surg Oncol* **27**(6): 2071-2080.

Bankovic, J., J. Stojic, D. Jovanovic, T. Andjelkovic, V. Milinkovic, S. Ruzdijic and N. Tanic (2010). "Identification of genes associated with non-small-cell lung cancer promotion and progression." *Lung Cancer* **67**(2): 151-159.

Cuffel, C., J. P. Rivals, Y. Zaugg, S. Salvi, W. Seelentag, D. E. Speiser, D. Lienard, P. Monnier, P. Romero, L. Bron and D. Rimoldi (2011). "Pattern and clinical significance of cancer-testis gene expression in head and neck squamous cell carcinoma." *Int J Cancer* **128**(11): 2625-2634.

Doolan, P., M. Clynes, S. Kennedy, J. P. Mehta, J. Crown and L. O'Driscoll (2008). "Prevalence and prognostic and predictive relevance of PRAME in breast cancer." *Breast Cancer Res Treat* **109**(2): 359-365.

Dyrskjot, L., K. Zieger, T. Kissow Lildal, T. Reinert, O. Gruselle, T. Coche, M. Borre and T. F. Orntoft (2012). "Expression of MAGE-A3, NY-ESO-1, LAGE-1 and PRAME in urothelial carcinoma." *Br J Cancer* **107**(1): 116-122.

Epping, M. T., A. A. Hart, A. M. Glas, O. Krijgsman and R. Bernardts (2008). "PRAME expression and clinical outcome of breast cancer." *Br J Cancer* **99**(3): 398-403.

Ercolak, V., S. Paydas, E. Bagir, M. Ergin, G. Seydaoglu, H. Celik, B. Yavu, K. Tanriverdi, M. Gunaldi, C. U. Afsar and B. B. Duman (2015). "PRAME Expression and Its Clinical Relevance in Hodgkin's Lymphoma." *Acta Haematol* **134**(4): 199-207.

Figueiredo, D. L., R. C. Mamede, R. Proto-Siqueira, L. Neder, W. A. Silva, Jr. and M. A. Zago (2006). "Expression of cancer testis antigens in head and neck squamous cell carcinomas." *Head Neck* **28**(7): 614-619.

Greiner, J., M. Ringhoffer, O. Simikopinko, A. Szmargowska, S. Huebsch, U. Maurer, L. Bergmann and M. Schmitt (2000). "Simultaneous expression of different immunogenic antigens in acute myeloid leukemia." *Experimental Hematology* **28**.

Greiner, J., M. Schmitt, L. Li, K. Giannopoulos, K. Bosch, A. Schmitt, K. Dohner, R. F. Schlenk, J. R. Pollack, H. Dohner and L. Bullinger (2006). "Expression of tumor-associated antigens in acute myeloid leukemia: Implications for specific immunotherapeutic approaches." *Blood* **108**(13): 4109-4117.

Hemminger, J. A., A. E. Toland, T. J. Scharschmidt, J. L. Mayerson, D. C. Guttridge and O. H. Iwenofu (2014). "Expression of cancer-testis antigens MAGEA1, MAGEA3, ACRBP, PRAME, SSX2, and CTAG2 in myxoid and round cell liposarcoma." *Mod Pathol* **27**(9): 1238-1245.

Huang, Q. S., J. Z. Wang, Y. Z. Qin, Q. Z. Zeng, Q. Jiang, H. Jiang, J. Lu, H. X. Liu, Y. Liu, J. B. Wang, L. Su, H. Y. Zhang, Z. L. Li, S. J. Gao, B. Huang, Y. Y. Liu, Y. R. Liu, L. P. Xu, X. J. Huang and X. H. Zhang (2019). "Overexpression of WT1 and PRAME predicts poor outcomes of patients with myelodysplastic syndromes with thrombocytopenia." *Blood Adv* **3**(21): 3406-3418.

Ikeda, H., B. Lethé, F. Lehmann, N. Van Baren, J.-F. Baurain, C. De Smet, H. Chambost, M. Vitale, A. Moretta, T. Boon and P. G. Coulie (1997). "Characterization of an Antigen That Is Recognized on a Melanoma Showing Partial HLA Loss by CTL Expressing an NK Inhibitory Receptor." *Immunity* **6**: 199-208.

Iura, K., K. Kohashi, Y. Hotokebuchi, T. Ishii, A. Maekawa, Y. Yamada, H. Yamamoto, Y. Iwamoto and Y. Oda (2015). "Cancer-testis antigens PRAME and NY-ESO-1 correlate with tumour grade and poor prognosis in myxoid liposarcoma." *J Pathol Clin Res* **1**(3): 144-159.

Iura, K., A. Maekawa, K. Kohashi, T. Ishii, H. Bekki, H. Otsuka, Y. Yamada, H. Yamamoto, K. Harimaya, Y. Iwamoto and Y. Oda (2017). "Cancer-testis antigen expression in synovial sarcoma: NY-ESO-1, PRAME, MAGEA4, and MAGEA1." *Hum Pathol* **61**: 130-139.

Lezcano, C., A. A. Jungbluth, K. S. Nehal, T. J. Hollmann and K. J. Busam (2018). "PRAME Expression in Melanocytic Tumors." *Am J Surg Pathol* **42**(11): 1456-1465.

Luk, S. J., D. M. van der Steen, R. S. Hagedoorn, E. S. Jordanova, M. W. Schilham, J. V. Bovee, A. H. Cleven, J. F. Falkenburg, K. Szuhai and M. H. Heemskerk (2018). "PRAME and HLA Class I expression patterns make synovial sarcoma a suitable target for PRAME specific T-cell receptor gene therapy." *Oncoimmunology* **7**(12): e1507600.

Matsushita, M., H. Ikeda, M. Kizaki, S. Okamoto, M. Ogasawara, Y. Ikeda and Y. Kawakami (2001). "Quantitative monitoring of the PRAME gene for the detection of minimal residual disease in leukaemia." *British Journal of Haematology* **112**: 916-926.

Mitsuhashi, K., A. Masuda, Y. H. Wang, M. Shiseki and T. Motoji (2014). "Prognostic significance of PRAME expression based on immunohistochemistry for diffuse large B-cell lymphoma patients treated with R-CHOP therapy." *Int J Hematol* **100**(1): 88-95.

Naik, A., R. Thomas, G. Al-Khadairi, R. Bacha, W. Hendrickx and J. Decock (2021). "Cancer testis antigen PRAME: An anti-cancer target with immunomodulatory potential." *J Cell Mol Med* **25**(22): 10376-10388.

Neumann, E., A. Engelsberg, J. Decker, S. Stoerkel, E. Jaeger, C. Huber and B. Seliger (1998). "Heterogeneous Expression of the Tumor-associated Antigens RAGE-1, FRAME, and Glycoprotein 75 in Human Renal Cell Carcinoma: Candidates for T-Cell-based Immunotherapies?" Cancer Research **58**: 4090-4095.

Oberthuer, A., B. Hero, R. Spitz, F. Berthold and M. Fischer (2004). "The Tumor-Associated Antigen PRAME Is Universally Expressed in High-Stage Neuroblastoma and Associated with Poor Outcome." Clin Cancer Res **10**: 4307-4313.

Onken, M. D., L. A. Worley, M. D. Tuscan and J. W. Harbour (2010). "An accurate, clinically feasible multi-gene expression assay for predicting metastasis in uveal melanoma." J Mol Diagn **12**(4): 461-468.

Orlando, D., E. Miele, B. De Angelis, M. Guercio, I. Boffa, M. Sinibaldi, A. Po, I. Caruana, L. Abballe, A. Carai, S. Caruso, A. Camera, A. Moseley, R. S. Hagedoorn, M. H. M. Heemskerk, F. Giangaspero, A. Mastronuzzi, E. Ferretti, F. Locatelli and C. Quintarelli (2018). "Adoptive Immunotherapy Using PRAME-Specific T Cells in Medulloblastoma." Cancer Res **78**(12): 3337-3349.

Oyama, K., K. Kanki, H. Shimizu, Y. Kono, J. Azumi, K. Toriguchi, E. Hatano and G. Shiota (2017). "Impact of Preferentially Expressed Antigen of Melanoma on the Prognosis of Hepatocellular Carcinoma." Gastrointest Tumors **3**(3-4): 128-135.

Pan, S. H., K. Y. Su, B. Spiessens, N. Kusuma, N. F. Delahaye, O. Gruselle, A. Myo, A. de Creus, J. Louahed, G. C. Chang, S. L. Yu and P. C. Yang (2017). "Gene expression of MAGE-A3 and PRAME tumor antigens and EGFR mutational status in Taiwanese non-small cell lung cancer patients." Asia Pac J Clin Oncol **13**(5): e212-e223.

Partheen, K., K. Levan, L. Osterberg, I. Claesson, G. Fallenius, K. Sundfeldt and G. Horvath (2008). "Four potential biomarkers as prognostic factors in stage III serous ovarian adenocarcinomas." Int J Cancer **123**(9): 2130-2137.

Partheen, K., K. Levan, L. Osterberg, I. Claesson, K. Sundfeldt and G. Horvath (2009). "External validation suggests Integrin beta 3 as prognostic biomarker in serous ovarian adenocarcinomas." BMC Cancer **9**: 336.

Partheen, K., K. Levan, L. Osterberg and G. Horvath (2006). "Expression analysis of stage III serous ovarian adenocarcinoma distinguishes a sub-group of survivors." Eur J Cancer **42**(16): 2846-2854.

Pellat-Deceunynck, C., M.-P. Mellerin, N. Labarrière, G. Jego, A. Moreau-Aubry, J.-L. Harousseau, F. Jotereau and R. Bataille (2000). "The cancer germ-line genes MAGE-1, MAGE-3 and PRAME are commonly expressed by human myeloma cells." Eur. J. Immunol. **30**: 803-809.

Proto-Siqueira, R., R. P. Falcão, C. A. de Souza, S. J. Ismael and M. A. Zago (2003). "The expression of PRAME in chronic lymphoproliferative disorders." Leukemia Research **27**(5): 393-396.

Steinbach, D., J. Hermann, S. Viehmann, F. Zintl and B. Gruhn (2002). "Clinical implications of PRAME gene expression in childhood acute myeloid leukemia." Cancer Genetics and Cytogenetics **133**: 118-123.

Steinbach, D., S. Viehmann, F. Zintl and B. Gruhn (2002). "PRAME gene expression in childhood acute lymphoblastic leukemia." Cancer Genetics and Cytogenetics **138**: 89-91.

Takata, K., L. C. Chong, D. Ennishi, T. Aoki, M. Y. Li, A. Thakur, S. Healy, E. Vigano, T. Dao, D. Kwon, G. Duns, J. S. Nielsen, S. Ben-Neriah, E. Tse, S. S. Hung, M. Boyle, S. S. Mun, C. M. Bourne, B. Woolcock, A. Telenius, M. Kishida, S. Rai, A. W. Zhang, A. Bashashati, S. Saberi, G. D'Antonio, B. H. Nelson, S. P. Shah, P. A. Hoodless, A. M. Melnick, R. D. Gascoyne, J. M. Connors, D. A. Scheinberg, W. Beguelin, D. W. Scott and C. Steidl (2022). "Tumor-associated antigen PRAME exhibits dualistic functions that are targetable in diffuse large B cell lymphoma." J Clin Invest **132**(10).

Tan, P., C. Zou, B. Yong, J. Han, L. Zhang, Q. Su, J. Yin, J. Wang, G. Huang, T. Peng and J. Shen (2012). "Expression and prognostic relevance of PRAME in primary osteosarcoma." Biochem Biophys Res Commun **419**(4): 801-808.

Thongprasert, S., P. C. Yang, J. S. Lee, R. Soo, O. Gruselle, A. Myo, J. Louahed, F. F. Lehmann, V. G. Brichard and T. Coche (2016). "The prevalence of expression of MAGE-A3 and PRAME tumor antigens in East and South East Asian non-small cell lung cancer patients." Lung Cancer **101**: 137-144.

Toledo, S. R., M. A. Zago, I. D. Oliveira, R. Proto-Siqueira, O. K. Okamoto, P. Severino, R. Z. Vêncio, F. T. Gamba, W. A. Silva, C. A. Moreira-Filho, C. A. Torre, M. T. Alves, R. J. Garcia-Filho, A. J. Simpson and A. S. Petrilli (2011). "Insights on PRAME and osteosarcoma by means of gene expression profiling." J Orthop Sci **16**(4): 458-466.

Van Baren, N., H. Chambost, A. Ferrant, L. Michaux, H. Ikeda, I. Millard, D. Olive, T. Boon and P. G. Coulie (1998). "PRAME, a gene encoding an antigen recognized on a human melanoma by cytolytic T cells, is expressed in acute leukaemia cells." British Journal of Haematology **102**: 1376-1379.

Watari, K., A. Tojo, T. Nagamura-Inoue, F. Nagamura, A. Takeshita, T. Fukushima, T. Motoji, K. Tani and S. Asano (2000). "Identification of a melanoma antigen, PRAME, as a BCR/ABL-inducible gene." FEBS Letters **466**: 367-371.

Xu, B., A. A. Jungbluth, D. Frosina, B. Alzumaili, N. Aleynick, E. Slodkowska, K. Higgins, A. Ho, L. Morris, R. Ghossein and N. Katabi (2019). "The immune microenvironment and expression of PD-L1, PD-1, PRAME and MHC I in salivary duct carcinoma." Histopathology **75**(5): 672-682.

Zhang, W., C. J. Barger, K. H. Eng, D. Klinkebiel, P. A. Link, A. Omilian, W. Bshara, K. Odunsi and A. R. Karpf (2016). "PRAME expression and promoter hypomethylation in epithelial ovarian cancer." Oncotarget **7**(9).

Zhu, H., J. Wang, J. Yin, B. Lu, Q. Yang, Y. Wan and C. Jia (2018). "Downregulation of PRAME Suppresses Proliferation and Promotes Apoptosis in Hepatocellular Carcinoma Through the Activation of P53 Mediated Pathway." Cell Physiol Biochem **45**(3): 1121-1135.

Zou, C., J. Shen, Q. Tang, Z. Yang, J. Yin, Z. Li, X. Xie, G. Huang, D. Lev and J. Wang (2012). "Cancer-testis antigens expressed in osteosarcoma identified by gene microarray correlate with a poor patient prognosis." Cancer **118**(7): 1845-1855.
